# Supplementary material for: When ‘Scientists Say’ Coffee Is Good for You One Day and Bad for You the Next: Do Generic Attributions to ‘Scientists’ and ‘Experts’ Amplify Perceived Conflict?
Source: Oxford University Press journal article supplement (doi:10.1525/collabra.23447), 2021-01-01
Supplement: collabra_2021_7_1_23447_59576.docx [file collabra_2021_7_1_23447_59576.docx]

Appendix 2

**Memory recall task.**

Instructions:

Earlier you saw some headlines and were asked to try and remember as many as possible. A selection of 7 of the headlines you saw previously are presented below, along with 7 you have not seen before.

Please select (by clicking) all the headlines you saw before. If you accidentally select a headline you can unselect it by clicking on it again.

You can make up to 7 selections.

| **Memory recall task** |
| --- |
| Rye is healthy, thanks to an interplay of microbes (**correct**) |
| ‘Healthy’ cereal bars contain more than 40% sugar (**correct**) |
| Turmeric compound could boost memory and mood (**correct**) |
| Always cook tomatoes and carrots but eat spinach and peppers RAW (**correct**) |
| Creatine linked to testicular cancer (**correct**) |
| Eating fish may be good for brain health (**correct**) |
| Artificially sweetened drinks linked to stroke (**correct**) |
| Popcorn is packed with antioxidants **(incorrect)** |
| Ramen noodles may lead to chronic illness **(incorrect)** |
| Chocolate cake for breakfast is good for you **(incorrect)** |
| Maple syrup helps antibiotics defeat bacteria **(incorrect)** |
| Danger in weekly fish and chips **(incorrect)** |
| Toast is more toxic than traffic fumes **(incorrect)** |
| Eating too much shark meat can damage your health **(incorrect)** |

The headlines were presented in a random order to each participant.
